# Supplementary material for: Knowledge, Attitudes, and Practices Related to Dietary Supplementation, before and during the COVID-19 Pandemic: Findings from a Cross-Sectional Survey in the Lebanese Population
Source: MDPI journal article supplement (doi:10.3390/ijerph18168856), 2021-08-23
Supplement: s1 [file s1]

**ANNEX 1: Participants' Knowledge about DSs by gender**

|                                                       |             | Males |      | Females |      |         |
|-------------------------------------------------------|-------------|-------|------|---------|------|---------|
|                                                       |             | N     | %    | N       | %    | P-value |
| All-natural herbs are safe                            | False       | 402   | 27.8 | 602     | 39.6 | <0.001  |
|                                                       | True        | 505   | 34.9 | 434     | 28.5 |         |
|                                                       | Do Not Know | 540   | 37.3 | 484     | 31.9 |         |
| DSs efficacy are based on clinical trials             | False       | 79    | 5.5  | 87      | 5.8  | 0.524   |
|                                                       | True        | 381   | 26.4 | 424     | 28.1 |         |
|                                                       | Do Not Know | 983   | 68.1 | 999     | 66.2 |         |
| Protein supplements strengthen muscles                | False       | 57    | 3.9  | 123     | 8.1  | <0.001  |
|                                                       | True        | 865   | 69.7 | 815     | 53.8 |         |
|                                                       | Do Not Know | 527   | 36.4 | 578     | 38.1 |         |
| FDA controls DSs                                      | False       | 93    | 6.4  | 110     | 7.3  | 0.023   |
|                                                       | True        | 531   | 36.8 | 620     | 41.0 |         |
|                                                       | Do Not Know | 819   | 56.8 | 782     | 51.7 |         |
| Supplement ingredients<br>interact with that of drugs | False       | 152   | 10.5 | 167     | 11.0 | 0.025   |
|                                                       | True        | 485   | 33.6 | 548     | 36.3 |         |
|                                                       | Do Not Know | 808   | 55.9 | 796     | 52.7 |         |
| DSs are pretested for safety                          | False       | 58    | 4.0  | 47      | 3.1  | <0.001  |
|                                                       | True        | 1028  | 71.0 | 1233    | 81.3 |         |

|                                                      |                       |     |      |     |      |        |
|------------------------------------------------------|-----------------------|-----|------|-----|------|--------|
|                                                      | Do Not Know           | 361 | 25.0 | 236 | 15.6 |        |
| DSs can be labeled as drugs                          | False                 | 235 | 16.3 | 236 | 15.6 | <0.001 |
|                                                      | True                  | 618 | 42.8 | 770 | 50.9 |        |
|                                                      | Do Not Know           | 592 | 40.9 | 508 | 33.5 |        |
| All<br>supplement products<br>in pharmacies are safe | False                 | 166 | 11.5 | 197 | 13.1 | 0.013  |
|                                                      | True                  | 448 | 31.0 | 525 | 34.9 |        |
|                                                      | Do Not Know           | 830 | 57.4 | 784 | 52.1 |        |
| Source of advice before COVID-19                     | Medical Prescription  | 202 | 40.5 | 519 | 76.7 | <0.001 |
|                                                      | Dietitian's Advice    | 130 | 26.1 | 119 | 17.7 |        |
|                                                      | Sport Trainer Advice  | 135 | 27.0 | 12  | 1.7  |        |
|                                                      | Athlete Advice        | 15  | 3.0  | 2   | 0.3  |        |
|                                                      | Friends Advice        | 18  | 3.5  | 24  | 3.6  |        |
|                                                      | Other Motives         | 0   | 0.0  | 0   | 0.0  |        |
| Source of advice during COVID-19.                    | Medical Prescription  | 306 | 53.1 | 527 | 77.9 | <0.001 |
|                                                      | Dietitian's Advice    | 150 | 25.9 | 99  | 14.7 |        |
|                                                      | Sport Trainer Advice  | 83  | 14.4 | 13  | 2.0  |        |
|                                                      | Athlete Advice        | 9   | 1.5  | 1   | 0.2  |        |
|                                                      | Friends Advice        | 29  | 5.1  | 36  | 5.3  |        |
|                                                      | Other Motives         | 0   | 0    | 0   | 0    |        |
| Source of<br>information before COVID-19.            | Health Care Providers | 358 | 51.7 | 580 | 69.4 | <0.001 |
|                                                      | Trusted Journals      | 62  | 8.9  | 70  | 8.4  |        |

|                                          |                       |     |      |     |      |       |
|------------------------------------------|-----------------------|-----|------|-----|------|-------|
|                                          | Sport Trainers        | 102 | 14.7 | 7   | 0.8  |       |
|                                          | Books                 | 1   | 0.2  | 3   | 0.4  |       |
|                                          | Magazines             | 3   | 0.4  | 1   | 0.1  |       |
|                                          | TV                    | 1   | 0.2  | 3   | 0.3  |       |
|                                          | Store Sale Person     | 13  | 1.9  | 9   | 1.0  |       |
|                                          | Family Members        | 10  | 1.4  | 23  | 2.8  |       |
|                                          | Friends               | 44  | 6.4  | 30  | 3.6  |       |
|                                          | Mass Media            | 72  | 10.3 | 74  | 8.8% |       |
|                                          | Other                 | 28  | 4.0  | 37  | 4.4  |       |
| Source of<br>information during COVID-19 | Health Care Providers | 461 | 63.2 | 566 | 63.9 | 0.001 |
|                                          | Trusted Journals      | 74  | 10.2 | 110 | 12.4 |       |
|                                          | Sport Trainers        | 25  | 3.5  | 35  | 3.9  |       |
|                                          | Books                 | 6   | 0.8  | 4   | 0.5  |       |
|                                          | Magazines             | 2   | 0.3  | 1   | 0.1  |       |
|                                          | TV                    | 0   | 0.0  | 3   | 0.3  |       |
|                                          | Store Sale Person     | 3   | 0.4  | 7   | 0.8  |       |
|                                          | Family Members        | 32  | 4.4  | 15  | 1.7  |       |
|                                          | Friends               | 26  | 3.5  | 43  | 4.8  |       |
|                                          | Mass Media            | 61  | 8.3  | 82  | 9.3  |       |
|                                          | Other                 | 40  | 5.5  | 21  | 2.4  |       |

## ANNEX 2: Attitudes regarding DSs beneficial use by gender

|                                               |          | Before<br>COVID-19 pandemic |      |        |      | During<br>COVID-19 pandemic |      |        |      | P value |       |
|-----------------------------------------------|----------|-----------------------------|------|--------|------|-----------------------------|------|--------|------|---------|-------|
|                                               |          | Male                        |      | Female |      | Male                        |      | Female |      |         |       |
|                                               |          | N                           | %    | N      | %    | N                           | %    | N      | %    | P1*     | P2*   |
| DSs are important for good health             | Agree    | 811                         | 56   | 868    | 57   | 977                         | 67.4 | 1094   | 71.9 | 0.012   | 0.010 |
|                                               | Neutral  | 492                         | 34   | 457    | 30.1 | 360                         | 24.8 | 308    | 20.2 |         |       |
|                                               | Disagree | 146                         | 10.1 | 196    | 12.9 | 112                         | 7.8  | 121    | 7.9  |         |       |
| DSs are important for immunity                | Agree    | 899                         | 62   | 974    | 64   | 1046                        | 72.2 | 1143   | 75.1 | 0.000   | 0.037 |
|                                               | Neutral  | 442                         | 30.5 | 379    | 24.9 | 319                         | 22   | 279    | 18.3 |         |       |
|                                               | Disagree | 108                         | 7.5  | 169    | 11.1 | 84                          | 5.8  | 100    | 6.5  |         |       |
| Food nutrients are sufficient for good health | Agree    | 1002                        | 69.1 | 1017   | 66.8 | 899                         | 62   | 838    | 55.1 | 0.074   | 0.000 |
|                                               | Neutral  | 322                         | 22.2 | 336    | 22.1 | 367                         | 25.3 | 425    | 27.9 |         |       |
|                                               | Disagree | 125                         | 8.6  | 169    | 11.1 | 184                         | 12.7 | 259    | 17   |         |       |
| DSs can replace the food nutrients            | Agree    | 331                         | 22.8 | 279    | 18.3 | 392                         | 27.1 | 330    | 21.6 | 0.000   | 0.000 |
|                                               | Neutral  | 505                         | 34.9 | 417    | 27.4 | 463                         | 31.9 | 399    | 26.2 |         |       |
|                                               | Disagree | 613                         | 42.3 | 826    | 54.3 | 594                         | 41   | 793    | 52.1 |         |       |
| DSs can cause symptoms                        | Agree    | 624                         | 43   | 754    | 49.5 | 625                         | 43.1 | 726    | 47.7 | 0.001   | 0.006 |
|                                               | Neutral  | 624                         | 43   | 561    | 36.9 | 614                         | 42.4 | 558    | 36.7 |         |       |
|                                               | Disagree | 202                         | 13.9 | 207    | 13.6 | 210                         | 14.5 | 238    | 15.6 |         |       |
| DSs affect health negatively                  | Agree    | 422                         | 29.1 | 504    | 33.1 | 410                         | 28.3 | 485    | 31.9 | 0.054   | 0.101 |
|                                               | Neutral  | 661                         | 45.6 | 643    | 42.3 | 658                         | 45.4 | 650    | 42.7 |         |       |
|                                               | Disagree | 367                         | 25.3 | 275    | 24.7 | 381                         | 26.3 | 318    | 20.9 |         |       |
| Vitamin C supplement protects from flu        | Yes      | 1124                        | 77.6 | 1204   | 79.1 | 1139                        | 78.6 | 1199   | 78.8 | 0.310   | 0.088 |
|                                               | No       | 325                         | 22.4 | 318    | 20.9 | 311                         | 21.4 | 323    | 21.2 |         |       |

P1: significance value for male and female comparison before COVID-19

P2: significance value for male and female comparison during COVID-19

## ANNEX 3: Practices regarding DSs beneficial use by gender

|  |  | Before<br>COVID-19<br>pandemic |   |        |   | During<br>COVID-19<br>pandemic |   |        |   | P value |     |
|--|--|--------------------------------|---|--------|---|--------------------------------|---|--------|---|---------|-----|
|  |  | Male                           |   | Female |   | Male                           |   | Female |   | P1*     | P2* |
|  |  | N                              | % | N      | % | N                              | % | N      | % |         |     |

|                           |                     |                  |                  |                  |                   |                  |                   |                  |                   |           |           |
|---------------------------|---------------------|------------------|------------------|------------------|-------------------|------------------|-------------------|------------------|-------------------|-----------|-----------|
| DSs Use                   | Yes                 | 9<br>9<br>9<br>9 | 6<br>8<br>.<br>9 | 1<br>1<br>7<br>8 | 7<br>7.<br>4<br>. | 9<br>7<br>7<br>. | 6<br>7.<br>4<br>0 | 1<br>1<br>0<br>0 | 7<br>2.<br>2<br>. | 0.0<br>00 | 0.0<br>04 |
|                           | No                  | 4<br>5<br>1      | 3<br>1<br>.<br>1 | 3<br>4<br>4<br>. | 2<br>2.<br>6<br>. | 4<br>7<br>3      | 3<br>2.<br>6      | 4<br>2<br>3      | 2<br>7.<br>8      |           |           |
| Cause of avoidance of DSs | Medical Reason      | 1<br>8           | 1<br>2<br>.<br>5 | 2<br>2<br>.      | 1<br>2<br>.       | 1<br>8           | 1<br>2.<br>9      | 2<br>2<br>.      | 1<br>2            | 0.0<br>01 | 0.0<br>03 |
|                           | Stomach Pain        | 3<br>5           | 2<br>4<br>.<br>5 | 6<br>5           | 3<br>5.<br>8      | 4<br>0           | 2<br>8.<br>2      | 6<br>0           | 3<br>2.<br>9      |           |           |
|                           | Insomnia            | 1<br>7           | 1<br>2<br>.<br>1 | 1<br>9           | 1<br>0.<br>6      | 1<br>7           | 1<br>1.<br>6      | 2<br>2<br>.      | 1<br>2.<br>2      |           |           |
|                           | Tachycardia         | 1<br>5           | 1<br>0<br>.<br>8 | 1                | 0.<br>7           | 1<br>5           | 1<br>0.<br>8      | 1<br>.           | 0.<br>7           |           |           |
|                           | Depressive symptoms | 1<br>1           | 7<br>.<br>4      | 8                | 4.<br>4           | 5                | 3.<br>3           | 8                | 4.<br>4           |           |           |
|                           | Nervousness         | 2                | 1<br>.<br>6      | 3                | 1.<br>7           | 2                | 1.<br>6           | 6                | 3.<br>5           |           |           |
|                           | Taste aversion      | 1<br>8           | 1<br>2<br>.<br>6 | 3<br>8           | 2<br>0.<br>8      | 1<br>8           | 1<br>2.<br>6      | 3<br>6           | 1<br>9.<br>5      |           |           |
|                           | High price          | 2<br>6           | 1<br>8<br>.<br>5 | 2<br>6           | 1<br>4            | 2<br>7           | 1<br>9            | 2<br>7           | 1<br>4.<br>8      |           |           |
| Protein Supplements use   | Yes                 | 2<br>0<br>1      | 1<br>3<br>.      | 4<br>6           | 3.<br>0           | 1<br>2<br>5      | 8.<br>7           | 3<br>7           | 2.<br>4           | 0.0<br>00 | 0.0<br>00 |

|                     |                    |                      |                  |                      |                       |                      |                       |                       |                       |           |           |
|---------------------|--------------------|----------------------|------------------|----------------------|-----------------------|----------------------|-----------------------|-----------------------|-----------------------|-----------|-----------|
|                     | No                 | 1<br>2<br>4<br>8     | 8<br>6<br>.<br>1 | 1<br>4<br>7<br>6     | 9<br>7<br><br>.       | 1<br>3<br>2<br>4     | 9<br>1.<br>3<br><br>. | 1<br>4<br>8<br>5      | 9<br>7.<br>6<br><br>. |           |           |
| Herbal Products use | Yes                | 6<br>0<br><br>.      | 4<br>.<br>1      | 1<br>2<br>8          | 8.<br>4<br><br>.      | 6<br>0<br><br>.      | 4.<br>2<br><br>.      | 1<br>1<br>8           | 7.<br>8<br><br>.      | 0.0<br>00 | 0.0<br>00 |
|                     | No                 | 1<br>3<br>9<br>0     | 9<br>5<br>.<br>9 | 1<br>4<br>0<br>4     | 9<br>2.<br>2<br><br>. | 1<br>3<br>8<br>9     | 9<br>5.<br>8<br><br>. | 1<br>4<br>0<br>4      | 9<br>2.<br>2<br><br>. |           |           |
| Energy Drinks use   | Yes                | 3<br>5<br>0<br><br>1 | 2<br>4<br>.<br>. | 1<br>7<br>0<br><br>. | 1<br>1.<br>2<br><br>. | 2<br>3<br>9<br><br>. | 1<br>6.<br>5<br><br>. | 1<br>1<br>8           | 7.<br>8<br><br>.      | 0.0<br>00 | 0.0<br>00 |
|                     | No                 | 1<br>0<br>9<br>9     | 7<br>5<br>.<br>9 | 1<br>3<br>5<br>2     | 8<br>8.<br>8<br><br>. | 1<br>2<br>1<br>0     | 8<br>3.<br>5<br><br>. | 1<br>4<br>0<br>4      | 9<br>2.<br>2<br><br>. |           |           |
| Source of Purchase  | Pharmacy           | 1<br>2<br>6<br><br>6 | 8<br>8<br>.<br>6 | 1<br>7<br>9<br><br>. | 9<br>7.<br>8<br><br>. | 1<br>3<br>5<br><br>. | 9<br>7<br>9<br><br>.  | 1<br>7.<br>7<br><br>. | 9<br>7.<br>7<br><br>. | 0.0<br>06 | 0.5<br>51 |
|                     | Supplements Store  | 1<br><br>.<br>9      | 0<br>.<br><br>.  | 1<br><br><br>.       | 0.<br>3<br><br>.      | 1<br><br>9<br><br>.  | 0.<br>1<br><br>.      | 1<br><br>3<br><br>.   | 0.<br>3<br><br>.      |           |           |
|                     | Healthy Food Store | 1<br><br>.<br>4      | 0<br>.<br><br>.  | 0<br><br><br>.       | 0.<br>3<br><br>.      | 1<br><br>4<br><br>.  | 0<br><br>.<br><br>.   | 0<br><br>3<br><br>.   | 0.<br>3<br><br>.      |           |           |
|                     | Gyms               | 1<br>1<br><br>5      | 7<br>.<br><br>.  | 1<br><br><br>.       | 0.<br>7<br><br>.      | 3<br><br>4<br><br>.  | 2<br>.<br><br>.       | 1<br><br>7<br><br>.   | 0.<br>7<br><br>.      |           |           |
|                     | Online Purchase    | 4<br><br>.<br>6      | 2<br>.<br><br>.  | 2<br><br><br>.       | 1.<br>0<br><br>.      | 2<br><br>3<br><br>.  | 1<br>.<br><br>.       | 2<br><br>1<br><br>.   | 1.<br>1<br><br>.      |           |           |
| Intake Form         | Pills              | 1<br>2<br>1          | 8<br>5<br><br>.  | 1<br>3<br>1          | 7<br>1.<br>8          | 1<br>3<br>0          | 9<br>1.<br>6          | 1<br>4<br>4           | 7<br>8.<br>9          | 0.0<br>00 | 0.0<br>16 |
|                     | Capsules           | 1<br>4               | 1<br>0           | 3<br>3               | 1<br>7.<br>9          | 8<br><br>.           | 5.<br>4               | 2<br>9                | 1<br>5.<br>8          |           |           |

|                   |           |   |   |   |    |   |    |   |    |           |           |
|-------------------|-----------|---|---|---|----|---|----|---|----|-----------|-----------|
|                   | Others    | 7 | 5 | 1 | 1  | 4 | 3. | 1 | 5. |           |           |
|                   |           |   |   | 9 | 0. |   | 0  | 0 | 3  |           |           |
|                   |           |   |   | 4 |    |   |    |   |    |           |           |
| Read of DSs Label | Always    | 4 | 2 | 4 | 3  | 4 | 3  | 5 | 3  | 0.0<br>14 | 0.0<br>06 |
|                   |           | 0 | 7 | 6 | 0. | 8 | 3. | 3 | 5. |           |           |
|                   |           | 2 | . | 6 | 6  | 2 | 3  | 8 | 3  |           |           |
|                   |           | 8 |   |   |    |   |    |   |    |           |           |
|                   | Sometimes | 4 | 2 | 4 | 3  | 4 | 2  | 4 | 3  |           |           |
|                   |           | 1 | 8 | 9 | 2. | 2 | 9. | 9 | 2. |           |           |
|                   |           | 4 | . | 5 | 5  | 9 | 6  | 6 | 6  |           |           |
|                   |           | 6 |   |   |    |   |    |   |    |           |           |
|                   | Rarely    | 2 | 1 | 2 | 1  | 2 | 1  | 2 | 1  |           |           |
|                   |           | 7 | 9 | 9 | 9. | 3 | 5. | 3 | 5. |           |           |
|                   |           | 5 | . | 4 | 3  | 1 | 9  | 0 | 1  |           |           |
|                   |           | 0 |   |   |    |   |    |   |    |           |           |
|                   | Never     | 3 | 2 | 2 | 1  | 3 | 2  | 2 | 1  |           |           |
|                   |           | 5 | 4 | 6 | 7. | 0 | 1. | 5 | 7. |           |           |
|                   |           | 8 | . | 7 | 5  | 8 | 2  | 9 | 0  |           |           |
|                   |           | 7 |   |   |    |   |    |   |    |           |           |

P1: significance value for male and female comparison before COVID-19

P2: significance value for male and female comparison during COVID-19

#### ANNEX 4: Estimated use of DSs

|               |              | Before COVID-19 Pandemic |      | During COVID-19 Pandemic |      | P-value |
|---------------|--------------|--------------------------|------|--------------------------|------|---------|
|               |              | N                        | %    | N                        | %    |         |
| Multivitamins | Never        | 1809                     | 60.9 | 1873                     | 63   | 0.009   |
|               | Monthly      | 317                      | 10.7 | 268                      | 9    |         |
|               | Weekly/Daily | 846                      | 28.5 | 831                      | 28   |         |
| Antioxidants  | Never        | 2345                     | 78.9 | 2290                     | 77   | 0.014   |
|               | Monthly      | 213                      | 7.2  | 219                      | 7.4  |         |
|               | Weekly/Daily | 415                      | 14   | 464                      | 15.6 |         |
| Vitamin A     | Never        | 2255                     | 75.9 | 2251                     | 75.7 | 0.588   |
|               | Monthly      | 248                      | 8.3  | 232                      | 7.8  |         |
|               | Weekly/Daily | 469                      | 15.8 | 489                      | 16.5 |         |
| Vitamin C     | Never        | 1362                     | 45.8 | 1298                     | 43.7 | <0.001  |
|               | Monthly      | 561                      | 18.9 | 423                      | 14.2 |         |
|               | Weekly/Daily | 1049                     | 35.3 | 1251                     | 42.1 |         |
| Vitamin D     | Never        | 1449                     | 48.8 | 1400                     | 47.1 | <0.001  |
|               | Monthly      | 469                      | 15.8 | 354                      | 11.9 |         |
|               | Weekly/Daily | 1054                     | 35.5 | 1218                     | 41   |         |
| Vitamin E     | Never        | 2268                     | 76.3 | 2232                     | 75.1 | 0.002   |
|               | Monthly      | 252                      | 8.5  | 218                      | 7.3  |         |
|               | Weekly/Daily | 451                      | 15.2 | 521                      | 17.5 |         |
| Vitamin B12   | Never        | 2061                     | 69.3 | 2096                     | 70.5 | 0.032   |
|               | Monthly      | 284                      | 9.6  | 248                      | 8.3  |         |
|               | Weekly/Daily | 627                      | 21.1 | 628                      | 21.1 |         |
| Folic acid    | Never        | 2296                     | 77.3 | 2279                     | 76.7 | 0.365   |
|               | Monthly      | 214                      | 7.2  | 213                      | 7.2  |         |
|               | Weekly/Daily | 461                      | 15.5 | 479                      | 16.1 |         |
| Calcium       | Never        | 2050                     | 69   | 2104                     | 70.8 | <0.001  |

|                                               |               |      |      |      |      |        |
|-----------------------------------------------|---------------|------|------|------|------|--------|
|                                               | Monthly       | 288  | 9.7  | 236  | 7.9  |        |
|                                               | Weekly/Daily  | 634  | 21.3 | 632  | 21.3 |        |
| Iron                                          | Never         | 1894 | 63.7 | 1974 | 66.4 | <0.001 |
|                                               | Monthly       | 305  | 10.3 | 253  | 8.5  |        |
|                                               | Weekly, daily | 772  | 26   | 744  | 25   |        |
| Magnesium                                     | Never         | 1826 | 61.4 | 1937 | 65.2 | <0.001 |
|                                               | Monthly       | 347  | 11.7 | 258  | 8.7  |        |
|                                               | Weekly/Daily  | 799  | 26.9 | 777  | 26.1 |        |
| Phosphorus                                    | Never         | 2374 | 79.9 | 2355 | 79.3 | <0.001 |
|                                               | Monthly       | 219  | 7.4  | 229  | 7.7  |        |
|                                               | Weekly/Daily  | 378  | 12.7 | 387  | 12   |        |
| Zinc                                          | Never         | 2177 | 73.3 | 1885 | 63.4 | <0.001 |
|                                               | Monthly       | 235  | 7.9  | 215  | 7.2  |        |
|                                               | Weekly/Daily  | 560  | 18.8 | 872  | 29.3 |        |
| Other<br>(Vitamins and<br>minerals)           | Never         | 2604 | 87.6 | 2525 | 84.9 | <0.001 |
|                                               | Monthly       | 100  | 3.4  | 124  | 4.2  |        |
|                                               | Weekly/Daily  | 269  | 9    | 324  | 10.9 |        |
| Protein<br>supplements                        | Never         | 2722 | 91.6 | 2811 | 94.6 | <0.001 |
|                                               | Monthly       | 5    | 0.2  | 14   | 0.5  |        |
|                                               | Weekly/Daily  | 244  | 8.2  | 146  | 4.9  |        |
| Other<br>protein<br>supplements<br>(Option 2) | Never         | 2907 | 97.8 | 2937 | 98.8 | <0.001 |
|                                               | Monthly       | 0    | 0    | 1    | 0.1  |        |
|                                               | Weekly/Daily  | 65   | 2.2  | 34   | 1.1  |        |
| Herbal products                               | Never         | 2787 | 93.7 | 2793 | 94   | 0.035  |
|                                               | Monthly       | 14   | 0.5  | 4    | 0.1  |        |
|                                               | Weekly/Daily  | 174  | 5.9  | 175  | 5.9  |        |
| Other<br>herbal products<br>(Option 2)        | Never         | 2912 | 98   | 2923 | 98.4 | 0.129  |
|                                               | Monthly       | 6    | 0.2  | 1    | 0.0  |        |
|                                               | Weekly/Daily  | 53   | 1.8  | 48   | 1.6  |        |
| Energy drinks                                 | < 7           | 2696 | 99.9 | 2696 | 99.9 | 1      |
|                                               | 7 or above    | 2    | 0.1  | 2    | 0.1  |        |
